# Supplementary material for: Epistatic interactions among metabolic genes depend upon environmental conditions
Source: Royal Society of Chemistry journal article supplement (doi:10.1039/c4mb00181h), 2014-07-14
Supplement: c4mb00181h1.pdf [file c4mb00181h1.pdf]

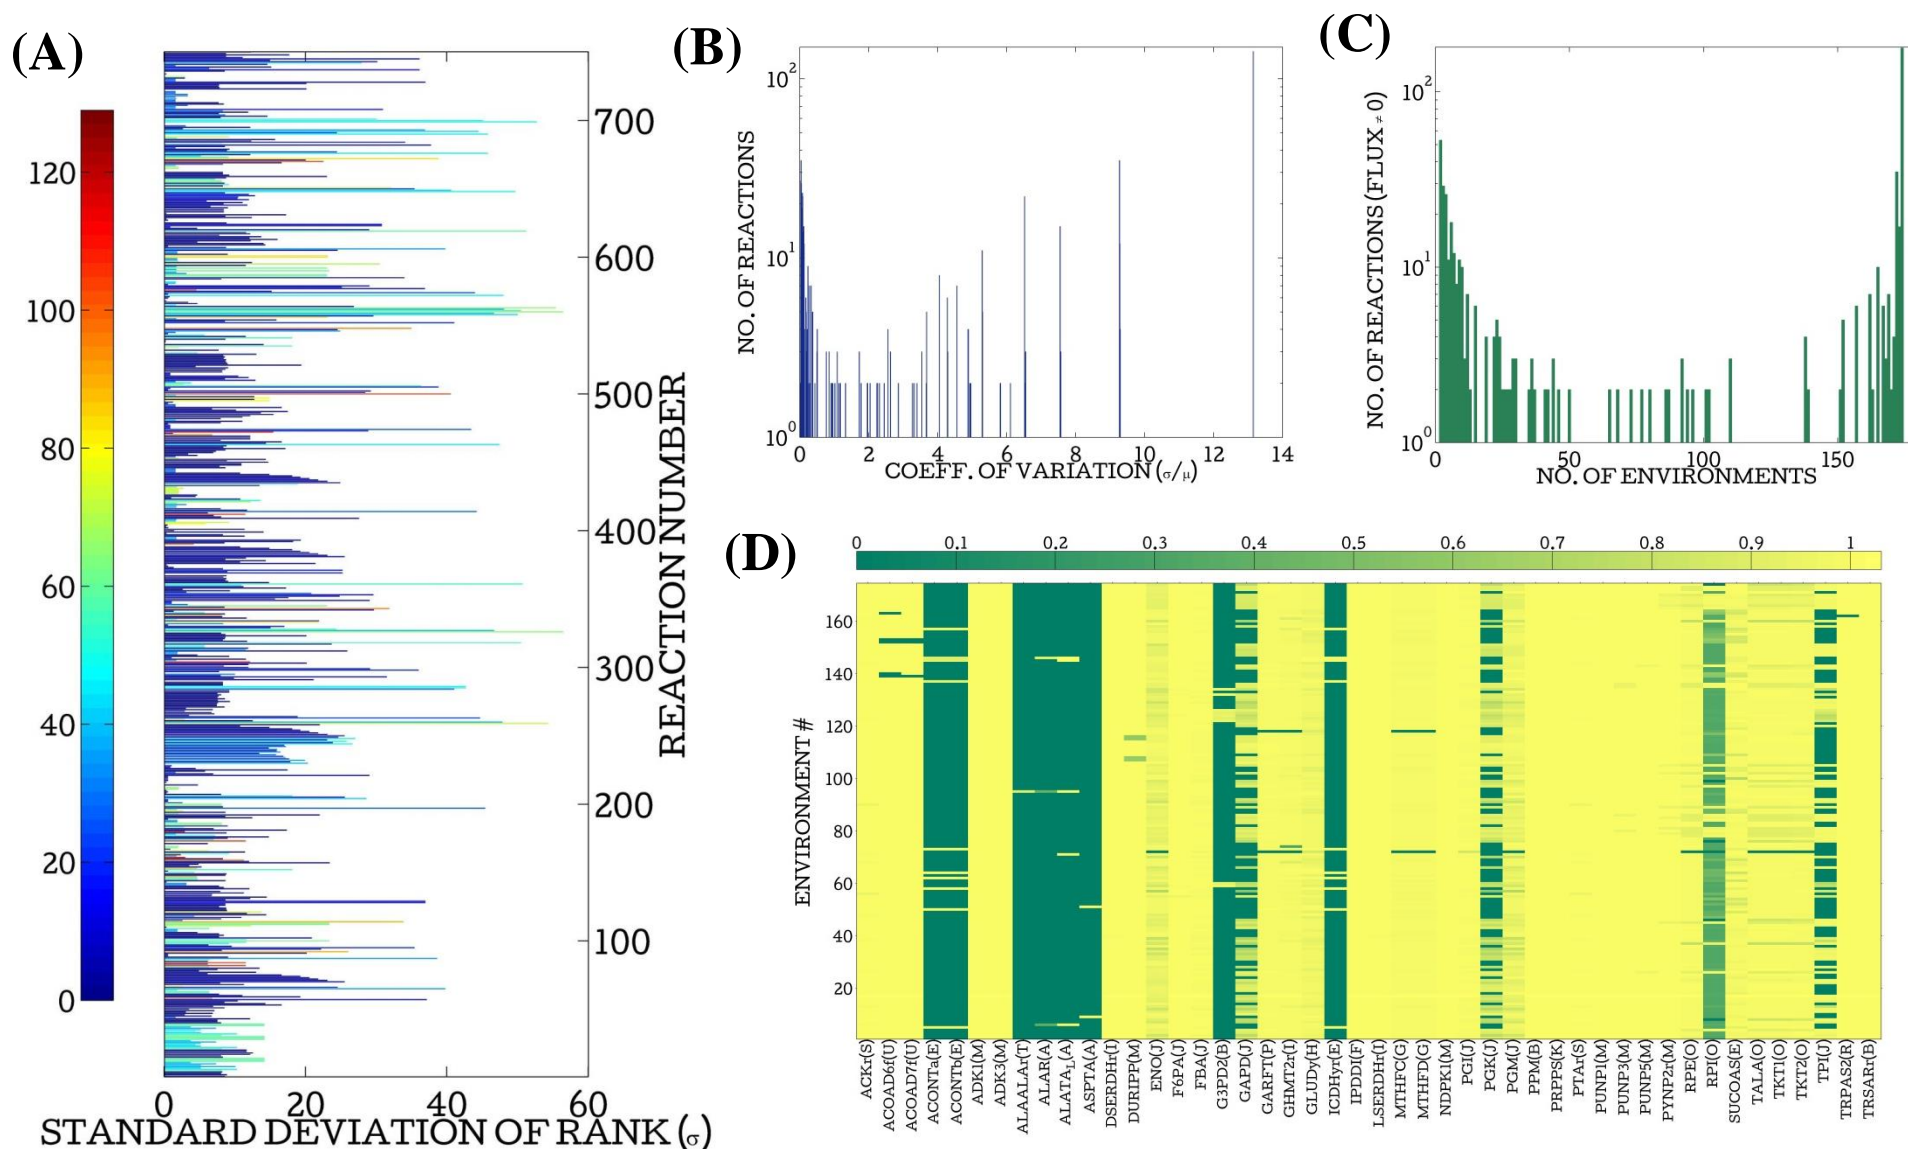

**Supplementary Figure 1: Fluxes for reactions in 174 different environmental conditions.** (A) Standard deviation of the rank calculated across 174 environmental conditions; color map represents the average of the rank across all 174 environmental conditions. (B) Distribution of coefficient of variation amongst reactions included in (A). (C) Distribution of all non-zero fluxes distributed across all 174 environmental conditions. (D) Fitness (growth rate ratio compared with Wild Type in a particular environmental condition) of single reaction deletions identified in Figure 1C; the letter in the parentheses represents the subsystem mentioned in Table 1.
