# Supplementary material for: Epistatic interactions among metabolic genes depend upon environmental conditions
Source: Royal Society of Chemistry journal article supplement (doi:10.1039/c4mb00181h), 2014-07-14
Supplement: c4mb00181h2.pdf [file c4mb00181h2.pdf]

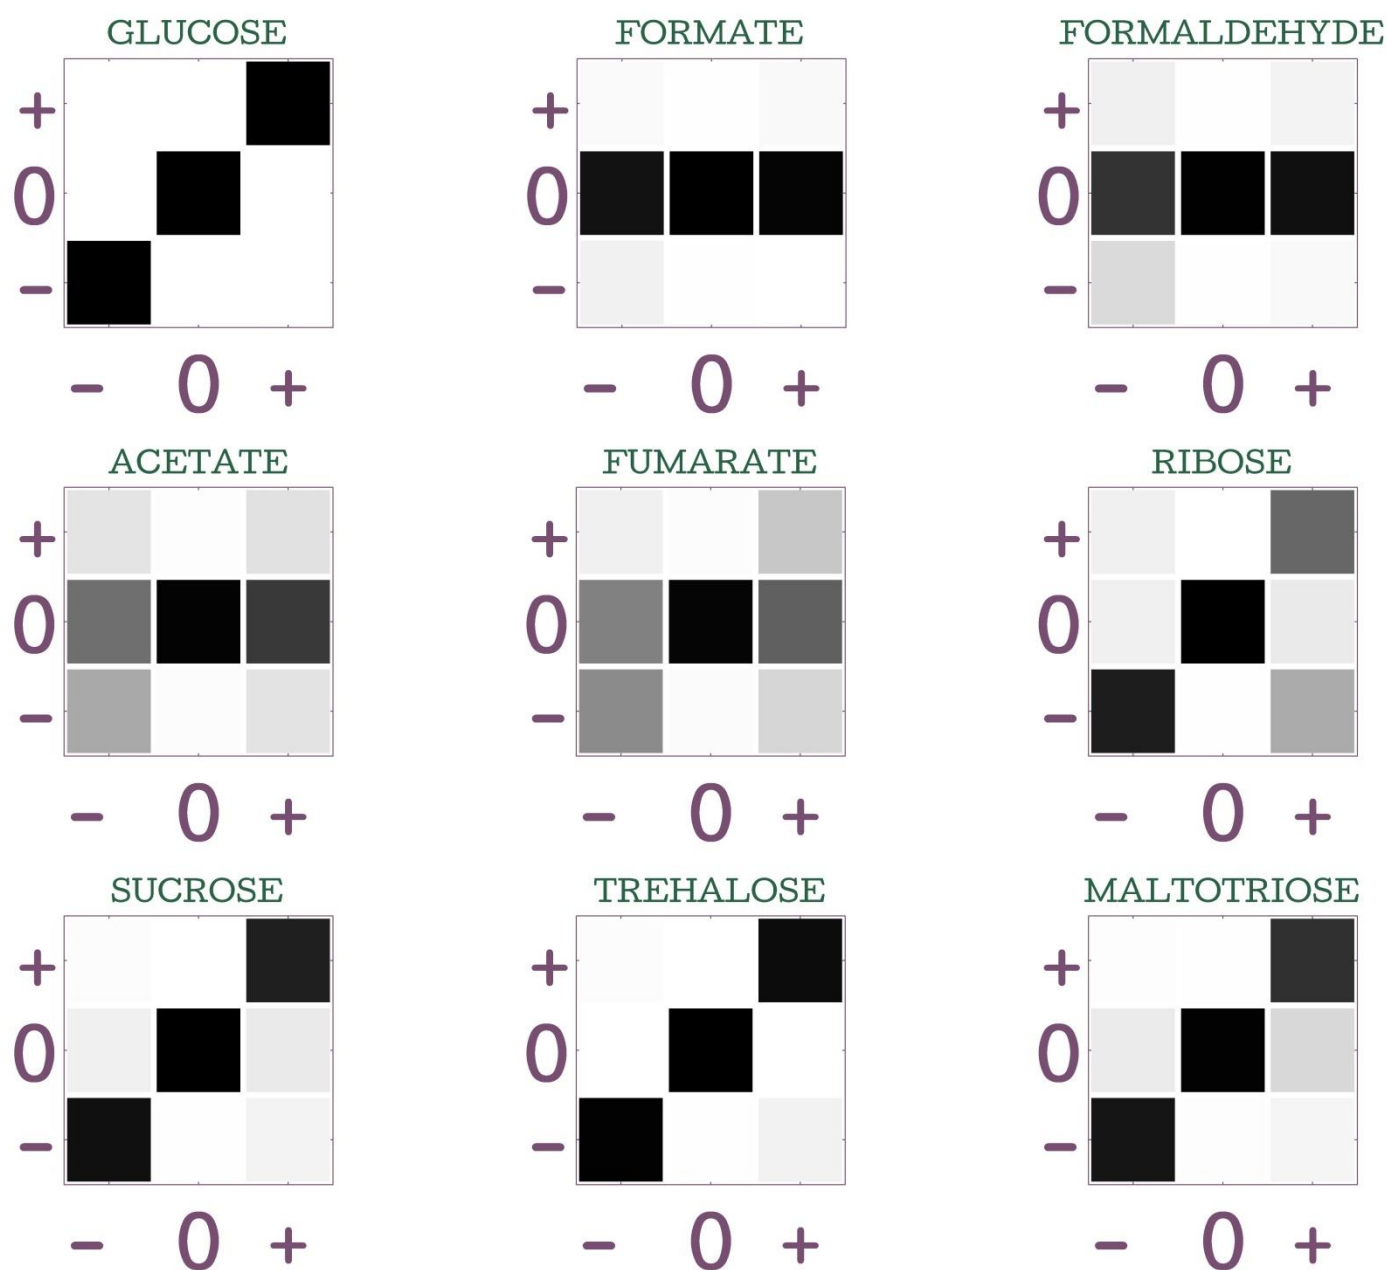

**Supplementary Figure 2: Comparison of epistasis in 9 different growth conditions, with respect to glucose.** The symbols -, 0 and + refer to negative, none and positive epistasis respectively. The x-axis is always glucose, while the y-axis is the other carbon source as stated. The number of interactions that fall in each category, i.e. matches or mismatches as shown are indicated by the shade of the corresponding box. The darker the box, more are the interactions in that category.
