# Supplementary material for: Epistatic interactions among metabolic genes depend upon environmental conditions
Source: Royal Society of Chemistry journal article supplement (doi:10.1039/c4mb00181h), 2014-07-14
Supplement: c4mb00181h3.pdf [file c4mb00181h3.pdf]

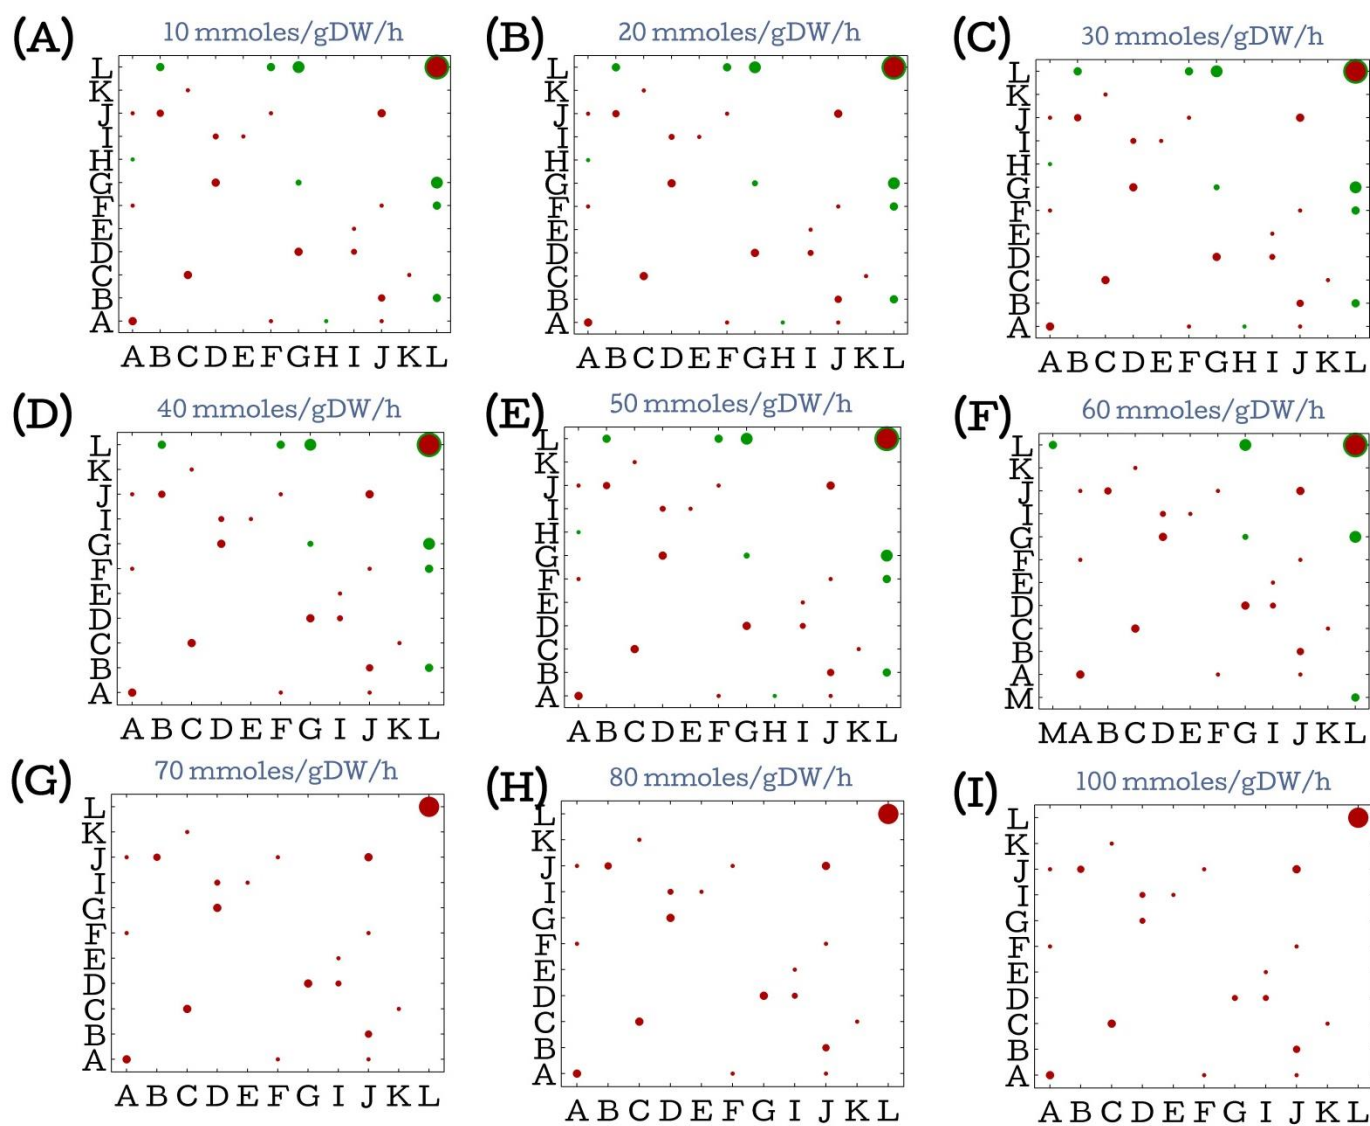

| Letter | Subsystem                                          |
|--------|----------------------------------------------------|
| A      | Glycerolipid Metabolism                            |
| B      | Glycolysis                                         |
| C      | Glyoxylate and Dicarboxylate Metabolism            |
| D      | Nitrogen Metabolism                                |
| E      | Others                                             |
| F      | Tyrosine, Tryptophan, and Phenylalanine Metabolism |
| G      | Photosynthesis                                     |

| Letter | Subsystem                            |
|--------|--------------------------------------|
| H      | Porphyrin and Chlorophyll Metabolism |
| I      | Pyrimidine Metabolism                |
| J      | Pyruvate Metabolism                  |
| K      | Sterol Biosynthesis                  |
| L      | Transport                            |
| M      | TCA cycle                            |

**Supplementary Figure 3: Epistasis interactions corresponding to increasing incident light.** Epistasis interactions calculated as incident light increases; **red** corresponds to negative interactions and **green** corresponds to positive interactions. The radius of the circle corresponds to number of interactions; the outer circle corresponds to total number of interactions (positive and negative). The letters on X-axis and Y-axis correspond to subsystems according to the legend shown in the figure.
