# Supplementary material for: Epistatic interactions among metabolic genes depend upon environmental conditions
Source: Royal Society of Chemistry journal article supplement (doi:10.1039/c4mb00181h), 2014-07-14
Supplement: c4mb00181h5.xlsx [file c4mb00181h5.xlsx]

## Sheet: Table 1 Genes
Genes in our analysis	Reactions constrained
b0040	CRNt7pp, CRNt8pp
b0114	PDH
b0116	AKGDH, GLYCL, PDH
b0123	CU1Opp, FEROpp
b0171	URIDK2r
b0242	GLU5K
b0243	G5SD
b0335	ACCOAL
b0394	HEX7
b0429	CYTBO3_4pp
b0469	ADPT
b0474	ADK1, ADK3, ADK4, ADNK1, DADK
b0507	GLXCL
b0508	HPYRI
b0514	GLYCK
b0529	MTHFC, MTHFD
b0593	ICHORSi
b0721	SUCDi
b0726	AKGDH
b0728	SUCOAS
b0767	PGL
b0888	TRDR
b0910	CYTK1, CYTK2
b1006	URAt2rpp
b1015	PPAt4pp, PROt4pp
b1091	ACOATA, KAS15
b1198	DHAPT
b1207	PRPPS
b1216	CA2t3pp
b1602	THD2pp
b1761	GLUDy
b1779	GAPD
b1849	GART
b1852	G6PDH2r
b2029	GND
b2234	RNDR1, RNDR2, RNDR3, RNDR4
b2265	ICHORS
b2276	NADH16pp, NADH17pp, NADH18pp
b2297	PTA2
b2406	ADNt2rpp, CYTDt2rpp, INSt2rpp, THMDt2rpp, URIt2rpp, XTSNt2rpp
b2415	ACGAptspp, ACMANAptspp, ACMUMptspp, ASCBptspp, DHAPT, FRUpts2pp, FRUptspp, MANptspp, GALTptspp, GAMptspp, GLCptspp, MALTptspp, MANGLYCptspp, MNLptspp, SBTptspp, SUCptspp, TREptspp
b2417	ACMUMptspp, MALTptspp, SUCptspp, TREptspp
b2436	CPPPGO
b2463	ME2
b2497	URAt2pp
b2500	GARFT
b2501	PPK2r, PPKr
b2508	IMPD
b2551	GHMT2r
b2675	RNDR1b, RNDR2b, RNDR3b, RNDR4b
b2779	ENO
b2889	IPDDI
b2903	GLYCL
b2913	PGCD
b2920	PPCSCT
b2926	PGK
b2964	DGSNt2pp, DINSt2pp, GSNt2pp, INSt2pp
b2979	GLYCTO2, GLYCTO3, GLYCTO4
b3089	SERt4pp, THRt4pp
b3115	PPAKr
b3236	MDH
b3403	PPCK
b3417	MLTP1, MLTP2, MLTP3
b3431	GLDBRAN2
b3432	GLBRAN2
b3500	GTHOr
b3528	ASPt2_2pp, FUMt2_2pp, MALDt2_2pp, MALTt2_2pp, OROTt2_2pp, SUCCt2_2pp
b3565	XLYI1, XLYI2
b3572	VPAMT
b3616	THRD
b3617	GLYAT
b3653	GLUt4pp
b3708	TRPAS2
b3731	ATPS4rpp
b3744	ASNS2
b3835	OPHHX
b3919	TPI
b3924	FLDR
b3956	PPC
b4025	PGI
b4036	14GLUCANtexi, GLCtexi, MALTHXtexi, MALTPTtexi, MALTTRtexi, MALTTTRtexi, MALTtexi
b4067	ACt4pp, GLYCLTt4pp
b4077	ASPt2pp, GLUt2rpp
b4094	R15BPK
b4111	CRNDt2rpp, CRNt2rpp, CTBTt2rpp, PROt2rpp
b4139	ASPT
b4151	FRD2, FRD3
b4208	ALAt2pp, BALAt2pp, DALAt2pp, DSERt2pp
b4238	RNTR1c, RNTR2c, RNTR3c, RNTR4c
b4239	TRE6PH
b4240	TREptspp
b4384	PUNP1, PUNP2
b4388	PSP_L

## Sheet: Table 2 Postive Interactions
		Carbon Source (# of positive interactions); whether the pair interacts in presence of a particular carbon soure									Carbon Source (# of positive interactions); whether the pair interacts in presence of a particular carbon soure
index of gene 1	index of gene 2	trehalose (79)	formate (3)	formaldehyde (17)	acetate (20)	fumarate (34)	ribose (75)	glucose (74)	sucrose (78)	maltotriose (66)	TRE (79)	FOR (3)	FALD (17)	ACET (20)	FUM (34)	RIB (75)	GLU (74)	SUCR (78)	MALTTR (66)	total	SUGARS (S)	ALDEHYDE (A)	CARBOXYLATE (C)
2	3	trehalose				fumarate	ribose	glucose	sucrose	maltotriose	1	0	0	0	1	1	1	1	1	6	5	0	1
2	6	trehalose						glucose	sucrose	maltotriose	1	0	0	0	0	0	1	1	1	4	4	0	0
2	7	trehalose						glucose	sucrose	maltotriose	1	0	0	0	0	0	1	1	1	4	4	0	0	total	freq		S	108
2	38	trehalose				fumarate	ribose	glucose	sucrose	maltotriose	1	0	0	0	1	1	1	1	1	6	5	0	1	9	0		A	17
2	74	trehalose					ribose	glucose	sucrose	maltotriose	1	0	0	0	0	1	1	1	1	5	5	0	0	8	3		C	49
2	88	trehalose						glucose	sucrose	maltotriose	1	0	0	0	0	0	1	1	1	4	4	0	0	7	4		S & A	6
3	18	trehalose					ribose		sucrose	maltotriose	1	0	0	0	0	1	0	1	1	4	4	0	0	6	10		S & A only	2
3	19	trehalose			acetate	fumarate	ribose	glucose	sucrose	maltotriose	1	0	0	1	1	1	1	1	1	7	5	0	2	5	40		A & C	4
3	20	trehalose			acetate	fumarate	ribose	glucose	sucrose	maltotriose	1	0	0	1	1	1	1	1	1	7	5	0	2	4	6		A & C only	0
3	74	trehalose					ribose	glucose	sucrose	maltotriose	1	0	0	0	0	1	1	1	1	5	5	0	0	3	5		S & C	18
3	79	trehalose					ribose	glucose	sucrose	maltotriose	1	0	0	0	0	1	1	1	1	5	5	0	0	2	13		S & C only	14
3	88	trehalose					ribose	glucose	sucrose	maltotriose	1	0	0	0	0	1	1	1	1	5	5	0	0	1	69		S & A & C	4
3	53				acetate						0	0	0	1	0	0	0	0	0	1	0	0	1		150		S alone	88
3	44					fumarate					0	0	0	0	1	0	0	0	0	1	0	0	1	total	freq		A alone	11
6	7	trehalose		formaldehyde	acetate	fumarate	ribose	glucose	sucrose	maltotriose	1	0	1	1	1	1	1	1	1	8	5	1	2	3	0		C alone	31
6	46	trehalose				fumarate	ribose	glucose	sucrose	maltotriose	1	0	0	0	1	1	1	1	1	6	5	0	1	2	8			150
6	61	trehalose		formaldehyde				glucose	sucrose	maltotriose	1	0	1	0	0	0	1	1	1	5	4	1	0	1	41
6	10			formaldehyde							0	0	1	0	0	0	0	0	0	1	0	1	0	0	101
6	79			formaldehyde							0	0	1	0	0	0	0	0	0	1	0	1	0		150
6	16					fumarate					0	0	0	0	1	0	0	0	0	1	0	0	1	total	freq				Aldehyde			Sugar
6	77							glucose			0	0	0	0	0	0	1	0	0	1	1	0	0	1	17
6	21						ribose				0	0	0	0	0	1	0	0	0	1	1	0	0	0	133
6	34						ribose				0	0	0	0	0	1	0	0	0	1	1	0	0		150
6	35						ribose				0	0	0	0	0	1	0	0	0	1	1	0	0	total	freq
6	80						ribose				0	0	0	0	0	1	0	0	0	1	1	0	0	5	53					Caboxylate
6	63									maltotriose	0	0	0	0	0	0	0	0	1	1	1	0	0	4	10
7	46	trehalose				fumarate	ribose	glucose	sucrose	maltotriose	1	0	0	0	1	1	1	1	1	6	5	0	1	3	5
7	61	trehalose		formaldehyde				glucose	sucrose	maltotriose	1	0	1	0	0	0	1	1	1	5	4	1	0	2	12
7	10			formaldehyde							0	0	1	0	0	0	0	0	0	1	0	1	0	1	28	108
7	79			formaldehyde							0	0	1	0	0	0	0	0	0	1	0	1	0	0	42
7	16					fumarate					0	0	0	0	1	0	0	0	0	1	0	0	1		150	108
7	77							glucose			0	0	0	0	0	0	1	0	0	1	1	0	0
7	21						ribose				0	0	0	0	0	1	0	0	0	1	1	0	0
7	34						ribose				0	0	0	0	0	1	0	0	0	1	1	0	0
7	35						ribose				0	0	0	0	0	1	0	0	0	1	1	0	0
7	80						ribose				0	0	0	0	0	1	0	0	0	1	1	0	0
7	63									maltotriose	0	0	0	0	0	0	0	0	1	1	1	0	0
10	74	trehalose					ribose	glucose	sucrose	maltotriose	1	0	0	0	0	1	1	1	1	5	5	0	0
10	88	trehalose	formate	formaldehyde		fumarate	ribose	glucose	sucrose	maltotriose	1	1	1	0	1	1	1	1	1	8	5	1	2
10	26			formaldehyde							0	0	1	0	0	0	0	0	0	1	0	1	0
10	48			formaldehyde							0	0	1	0	0	0	0	0	0	1	0	1	0
10	75			formaldehyde							0	0	1	0	0	0	0	0	0	1	0	1	0
16	80	trehalose							sucrose		1	0	0	0	0	0	0	1	0	2	2	0	0
16	49				acetate	fumarate					0	0	0	1	1	0	0	0	0	2	0	0	2
16	53				acetate						0	0	0	1	0	0	0	0	0	1	0	0	1
16	51					fumarate					0	0	0	0	1	0	0	0	0	1	0	0	1
16	88					fumarate					0	0	0	0	1	0	0	0	0	1	0	0	1
18	19	trehalose				fumarate	ribose	glucose	sucrose	maltotriose	1	0	0	0	1	1	1	1	1	6	5	0	1
18	20	trehalose				fumarate	ribose	glucose	sucrose	maltotriose	1	0	0	0	1	1	1	1	1	6	5	0	1
18	74	trehalose					ribose	glucose	sucrose	maltotriose	1	0	0	0	0	1	1	1	1	5	5	0	0
18	44					fumarate					0	0	0	0	1	0	0	0	0	1	0	0	1
18	77						ribose				0	0	0	0	0	1	0	0	0	1	1	0	0
18	88						ribose	glucose			0	0	0	0	0	1	1	0	0	2	2	0	0
19	20	trehalose			acetate	fumarate	ribose	glucose	sucrose	maltotriose	1	0	0	1	1	1	1	1	1	7	5	0	2
19	74	trehalose					ribose	glucose	sucrose	maltotriose	1	0	0	0	0	1	1	1	1	5	5	0	0
19	79	trehalose					ribose	glucose	sucrose	maltotriose	1	0	0	0	0	1	1	1	1	5	5	0	0
19	44					fumarate					0	0	0	0	1	0	0	0	0	1	0	0	1
19	32								sucrose		0	0	0	0	0	0	0	1	0	1	1	0	0
19	51								sucrose		0	0	0	0	0	0	0	1	0	1	1	0	0
19	56								sucrose		0	0	0	0	0	0	0	1	0	1	1	0	0
20	74	trehalose					ribose	glucose	sucrose	maltotriose	1	0	0	0	0	1	1	1	1	5	5	0	0
20	79	trehalose					ribose	glucose	sucrose	maltotriose	1	0	0	0	0	1	1	1	1	5	5	0	0
20	80	trehalose							sucrose		1	0	0	0	0	0	0	1	0	2	2	0	0
20	44					fumarate					0	0	0	0	1	0	0	0	0	1	0	0	1
20	88					fumarate					0	0	0	0	1	0	0	0	0	1	0	0	1
20	32								sucrose		0	0	0	0	0	0	0	1	0	1	1	0	0
20	56								sucrose		0	0	0	0	0	0	0	1	0	1	1	0	0
21	34	trehalose					ribose	glucose	sucrose	maltotriose	1	0	0	0	0	1	1	1	1	5	5	0	0
21	35	trehalose					ribose	glucose	sucrose	maltotriose	1	0	0	0	0	1	1	1	1	5	5	0	0
21	74	trehalose					ribose	glucose	sucrose	maltotriose	1	0	0	0	0	1	1	1	1	5	5	0	0
21	88	trehalose					ribose	glucose	sucrose	maltotriose	1	0	0	0	0	1	1	1	1	5	5	0	0
21	80						ribose				0	0	0	0	0	1	0	0	0	1	1	0	0
23	53				acetate						0	0	0	1	0	0	0	0	0	1	0	0	1
30	88		formate								0	1	0	0	0	0	0	0	0	1	0	0	1
31	53				acetate						0	0	0	1	0	0	0	0	0	1	0	0	1
31	88						ribose				0	0	0	0	0	1	0	0	0	1	1	0	0
32	35	trehalose					ribose	glucose	sucrose	maltotriose	1	0	0	0	0	1	1	1	1	5	5	0	0
32	41	trehalose						glucose			1	0	0	0	0	0	1	0	0	2	2	0	0
32	51	trehalose					ribose	glucose	sucrose		1	0	0	0	0	1	1	1	0	4	4	0	0
32	56	trehalose					ribose	glucose	sucrose	maltotriose	1	0	0	0	0	1	1	1	1	5	5	0	0
32	79	trehalose					ribose	glucose	sucrose	maltotriose	1	0	0	0	0	1	1	1	1	5	5	0	0
32	80	trehalose						glucose	sucrose		1	0	0	0	0	0	1	1	0	3	3	0	0
32	88	trehalose					ribose	glucose	sucrose	maltotriose	1	0	0	0	0	1	1	1	1	5	5	0	0
34	35	trehalose					ribose	glucose	sucrose	maltotriose	1	0	0	0	0	1	1	1	1	5	5	0	0
34	74	trehalose					ribose	glucose	sucrose	maltotriose	1	0	0	0	0	1	1	1	1	5	5	0	0
34	88	trehalose					ribose	glucose	sucrose	maltotriose	1	0	0	0	0	1	1	1	1	5	5	0	0
34	80						ribose				0	0	0	0	0	1	0	0	0	1	1	0	0
35	56	trehalose					ribose	glucose	sucrose	maltotriose	1	0	0	0	0	1	1	1	1	5	5	0	0
35	74	trehalose					ribose	glucose	sucrose	maltotriose	1	0	0	0	0	1	1	1	1	5	5	0	0
35	77	trehalose					ribose	glucose	sucrose	maltotriose	1	0	0	0	0	1	1	1	1	5	5	0	0
35	88	trehalose					ribose	glucose	sucrose	maltotriose	1	0	0	0	0	1	1	1	1	5	5	0	0
35	80						ribose				0	0	0	0	0	1	0	0	0	1	1	0	0
38	61	trehalose		formaldehyde	acetate	fumarate	ribose	glucose	sucrose	maltotriose	1	0	1	1	1	1	1	1	1	8	5	1	2
38	74	trehalose					ribose	glucose	sucrose	maltotriose	1	0	0	0	0	1	1	1	1	5	5	0	0
38	88	trehalose				fumarate	ribose	glucose	sucrose	maltotriose	1	0	0	0	1	1	1	1	1	6	5	0	1
38	51				acetate						0	0	0	1	0	0	0	0	0	1	0	0	1
38	62				acetate						0	0	0	1	0	0	0	0	0	1	0	0	1
38	44					fumarate					0	0	0	0	1	0	0	0	0	1	0	0	1
41	51	trehalose						glucose			1	0	0	0	0	0	1	0	0	2	2	0	0
41	56	trehalose						glucose			1	0	0	0	0	0	1	0	0	2	2	0	0
41	74	trehalose						glucose			1	0	0	0	0	0	1	0	0	2	2	0	0
41	80	trehalose						glucose			1	0	0	0	0	0	1	0	0	2	2	0	0
46	48	trehalose					ribose	glucose	sucrose	maltotriose	1	0	0	0	0	1	1	1	1	5	5	0	0
46	75	trehalose					ribose	glucose	sucrose	maltotriose	1	0	0	0	0	1	1	1	1	5	5	0	0
46	88	trehalose				fumarate	ribose	glucose	sucrose	maltotriose	1	0	0	0	1	1	1	1	1	6	5	0	1
46	53				acetate						0	0	0	1	0	0	0	0	0	1	0	0	1
46	51					fumarate					0	0	0	0	1	0	0	0	0	1	0	0	1
47	88					fumarate					0	0	0	0	1	0	0	0	0	1	0	0	1
48	61			formaldehyde							0	0	1	0	0	0	0	0	0	1	0	1	0
48	79			formaldehyde							0	0	1	0	0	0	0	0	0	1	0	1	0
48	63									maltotriose	0	0	0	0	0	0	0	0	1	1	1	0	0
49	80	trehalose					ribose		sucrose		1	0	0	0	0	1	0	1	0	3	3	0	0
49	88	trehalose				fumarate		glucose	sucrose	maltotriose	1	0	0	0	1	0	1	1	1	5	4	0	1
49	53				acetate						0	0	0	1	0	0	0	0	0	1	0	0	1
49	51					fumarate					0	0	0	0	1	0	0	0	0	1	0	0	1
51	56	trehalose					ribose	glucose	sucrose		1	0	0	0	0	1	1	1	0	4	4	0	0
51	77	trehalose					ribose	glucose	sucrose	maltotriose	1	0	0	0	0	1	1	1	1	5	5	0	0
51	79	trehalose					ribose	glucose	sucrose	maltotriose	1	0	0	0	0	1	1	1	1	5	5	0	0
51	88	trehalose				fumarate	ribose	glucose	sucrose	maltotriose	1	0	0	0	1	1	1	1	1	6	5	0	1
51	53				acetate						0	0	0	1	0	0	0	0	0	1	0	0	1
51	62				acetate						0	0	0	1	0	0	0	0	0	1	0	0	1
51	54					fumarate					0	0	0	0	1	0	0	0	0	1	0	0	1
51	93					fumarate					0	0	0	0	1	0	0	0	0	1	0	0	1
53	54				acetate						0	0	0	1	0	0	0	0	0	1	0	0	1
53	62				acetate						0	0	0	1	0	0	0	0	0	1	0	0	1
53	93				acetate						0	0	0	1	0	0	0	0	0	1	0	0	1
54	80	trehalose							sucrose		1	0	0	0	0	0	0	1	0	2	2	0	0
54	93	trehalose			acetate	fumarate	ribose	glucose	sucrose	maltotriose	1	0	0	1	1	1	1	1	1	7	5	0	2
54	88						ribose				0	0	0	0	0	1	0	0	0	1	1	0	0
56	79	trehalose					ribose	glucose	sucrose	maltotriose	1	0	0	0	0	1	1	1	1	5	5	0	0
56	80	trehalose						glucose	sucrose		1	0	0	0	0	0	1	1	0	3	3	0	0
56	88	trehalose					ribose	glucose	sucrose	maltotriose	1	0	0	0	0	1	1	1	1	5	5	0	0
61	74	trehalose					ribose	glucose	sucrose	maltotriose	1	0	0	0	0	1	1	1	1	5	5	0	0
61	80	trehalose							sucrose		1	0	0	0	0	0	0	1	0	2	2	0	0
61	88	trehalose	formate	formaldehyde				glucose	sucrose	maltotriose	1	1	1	0	0	0	1	1	1	6	4	1	1
61	75			formaldehyde							0	0	1	0	0	0	0	0	0	1	0	1	0
63	75									maltotriose	0	0	0	0	0	0	0	0	1	1	1	0	0
63	88									maltotriose	0	0	0	0	0	0	0	0	1	1	1	0	0
67	88					fumarate					0	0	0	0	1	0	0	0	0	1	0	0	1
74	79	trehalose					ribose	glucose	sucrose	maltotriose	1	0	0	0	0	1	1	1	1	5	5	0	0
74	80	trehalose					ribose	glucose			1	0	0	0	0	1	1	0	0	3	3	0	0
74	88	trehalose					ribose	glucose	sucrose	maltotriose	1	0	0	0	0	1	1	1	1	5	5	0	0
75	79			formaldehyde							0	0	1	0	0	0	0	0	0	1	0	1	0
77	79	trehalose					ribose	glucose	sucrose	maltotriose	1	0	0	0	0	1	1	1	1	5	5	0	0
77	80	trehalose						glucose	sucrose		1	0	0	0	0	0	1	1	0	3	3	0	0
77	88	trehalose					ribose	glucose	sucrose	maltotriose	1	0	0	0	0	1	1	1	1	5	5	0	0
79	80	trehalose							sucrose		1	0	0	0	0	0	0	1	0	2	2	0	0
80	93	trehalose							sucrose		1	0	0	0	0	0	0	1	0	2	2	0	0
80	88						ribose				0	0	0	0	0	1	0	0	0	1	1	0	0
88	93						ribose				0	0	0	0	0	1	0	0	0	1	1	0	0
											79	3	17	20	34	75	74	78	66
											TRE (79)	FOR (3)	FALD (17)	ACET (20)	FUM (34)	RIB (75)	GLU (74)	SUCR (78)	MALTTR (66)

## Sheet: Table 3 Negative Interactions
index of gene 1	index of gene 2	trehalose	formate	formaldehyde	acetate	fumarate	ribose	glucose	sucrose	maltotriose	TRE	FOR	FALD	ACET	FUM	RIB	GLU	SUCR	MALTTR	total	SUGARS (S)	ALDEHYDE (A)	CARBOXYLATE (C)
5	23	trehalose	formate	formaldehyde	acetate	fumarate	ribose	glucose	sucrose	maltotriose	1	1	1	1	1	1	1	1	1	9	5	1	3
9	68								sucrose		0	0	0	0	0	0	0	1	0	1	1	0	0
10	38			formaldehyde	acetate	fumarate					0	0	1	1	1	0	0	0	0	3	0	1	2	total	freq
12	28	trehalose	formate	formaldehyde	acetate	fumarate	ribose	glucose	sucrose	maltotriose	1	1	1	1	1	1	1	1	1	9	5	1	3	9	5		S	17
12	84	trehalose	formate	formaldehyde	acetate	fumarate	ribose	glucose	sucrose	maltotriose	1	1	1	1	1	1	1	1	1	9	5	1	3	8	0		A	8
13	51			formaldehyde	acetate	fumarate					0	0	1	1	1	0	0	0	0	3	0	1	2	7	5		C	14
16	33	trehalose			acetate	fumarate	ribose	glucose	sucrose	maltotriose	1	0	0	1	1	1	1	1	1	7	5	0	2	6	0		S & A	5
16	46	trehalose			acetate	fumarate	ribose	glucose	sucrose	maltotriose	1	0	0	1	1	1	1	1	1	7	5	0	2	5	6		S & A only	0
18	51					fumarate					0	0	0	0	1	0	0	0	0	1	0	0	1	4	0		A & C	7
22	66	trehalose	formate	formaldehyde	acetate	fumarate	ribose	glucose	sucrose	maltotriose	1	1	1	1	1	1	1	1	1	9	5	1	3	3	2		A & C only	2
28	84	trehalose	formate	formaldehyde	acetate	fumarate	ribose	glucose	sucrose	maltotriose	1	1	1	1	1	1	1	1	1	9	5	1	3	2	0		S & C	10
32	74	trehalose					ribose	glucose	sucrose	maltotriose	1	0	0	0	0	1	1	1	1	5	5	0	0	1	4		S & C only	5
32	77	trehalose					ribose	glucose	sucrose	maltotriose	1	0	0	0	0	1	1	1	1	5	5	0	0		22		S & A & C	5
33	46	trehalose			acetate	fumarate	ribose	glucose	sucrose	maltotriose	1	0	0	1	1	1	1	1	1	7	5	0	2	total	freq		S alone	7
49	54	trehalose			acetate	fumarate	ribose	glucose	sucrose	maltotriose	1	0	0	1	1	1	1	1	1	7	5	0	2	3	5		A alone	1
49	93	trehalose			acetate	fumarate	ribose	glucose	sucrose	maltotriose	1	0	0	1	1	1	1	1	1	7	5	0	2	2	7		C alone	2
51	74	trehalose					ribose	glucose	sucrose	maltotriose	1	0	0	0	0	1	1	1	1	5	5	0	0	1	2	14		22
51	79			formaldehyde							0	0	1	0	0	0	0	0	0	1	0	1	0	0	8
56	74	trehalose					ribose	glucose	sucrose	maltotriose	1	0	0	0	0	1	1	1	1	5	5	0	0		22
56	77	trehalose					ribose	glucose	sucrose	maltotriose	1	0	0	0	0	1	1	1	1	5	5	0	0	total	freq
68	80		formate								0	1	0	0	0	0	0	0	0	1	0	0	1	1	8	8
74	77	trehalose					ribose	glucose	sucrose	maltotriose	1	0	0	0	0	1	1	1	1	5	5	0	0	0	14
																									22
																								total	freq
																								5	16
																								4	0
																								3	0
																								2	0
																								1	1	17
																								0	5
																									22	31

## Sheet: Table 4 E. coli Subsystems
Letter	Subsystem
A	Alanine and Aspartate Metabolism
B	Alternate Carbon Metabolism
C	Anaplerotic Reactions
D	Arginine and Proline Metabolism
E	Citric Acid Cycle
F	Cofactor and Prosthetic Group Biosynthesis
G	Folate Metabolism
H	Glutamate Metabolism
I	Glycine and Serine Metabolism
J	Glycolysis/Gluconeogenesis
K	Histidine Metabolism
L	Inorganic Ion Transport
M	Nucleotide Salvage Pathway
N	Oxidative Phosphorylation
O	Pentose Phosphate Pathway
P	Purine and Pyrimidine Biosynthesis
Q	Inner Membrane Transport
R	Tyrosine, Tryptophan, and Phenylalanine Metabolism
S	Pyruvate Metabolism
T	Cell Envelope Biosynthesis
U	Membrane Lipid Metabolism
Supplementary Table 4: The E. coli subsystems corresponding to letters in Figure 1, 3, and 4.

## Sheet: Table 5 Synechocystis Subsystem
Letter	Subsystem
A	Carbon Fixation
B	TCA cycle
C	Glycerolipid Metabolism
D	Glycolysis
E	Glyoxylate and Dicarboxylate Metabolism
F	Nitrogen Metabolism
G	Others
H	Oxidative Phosphorylation
I	Pentose Phosphate Pathway
J	Photosynthesis
K	Pyrimidine Metabolism
L	Pyruvate Metabolism
M	Transport
Supplementary Table 5: The Synechocystis (heterotrophic growth with glucose) subsystems corresponding to letters in Figure 3.
